# Supplementary material for: Comparing Three Approaches to Modelling the Effects of Temperature and Rainfall on Malaria Incidence in Different Climatic Regions
Source: bioRxiv or medRxiv preprint supplement (doi:10.1101/2024.07.19.24310710), 2025-10-21
Supplement: Supplementary file [file media-1.pdf]

# Comparing different approaches of modelling the effects of temperature and rainfall on malaria transmission in high and low transmission settings

Gladstone T. Madito<sup>1\*</sup> and Sheetal P. Silal<sup>1,2</sup>

<sup>1</sup> Modelling And Simulations Hub, Africa (MASHA), Department of Statistical Sciences, University of Cape Town, Cape Town, South Africa.

<sup>2</sup> Centre for Global Health, Nuffield Department of Medicine, University of Oxford, Oxford, United Kingdom.

\*Corresponding author(s). E-mail(s): [mdt gla001@myuct.ac.za](mailto:mdt gla001@myuct.ac.za);

## Appendix A Supplementary plots

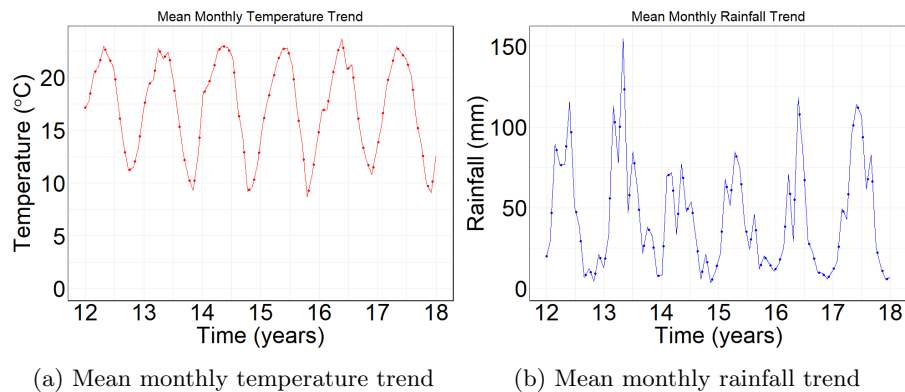

**Fig. A1:** Mean monthly temperature and rainfall trends used to simulate the models for a period of 6 years from year 12 to 18.

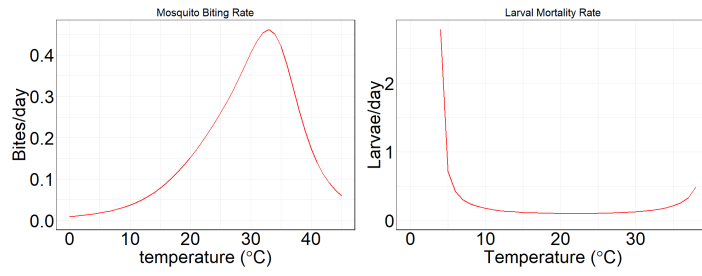

(a) Daily mosquito biting rate. (b) Daily larval mortality rate.

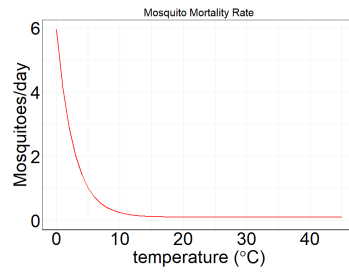

(c) Daily mosquito mortality rate.

**Fig. A2:** Thermal response curves of temperature regulated mosquito life-cycle characteristics examined in Approach A.

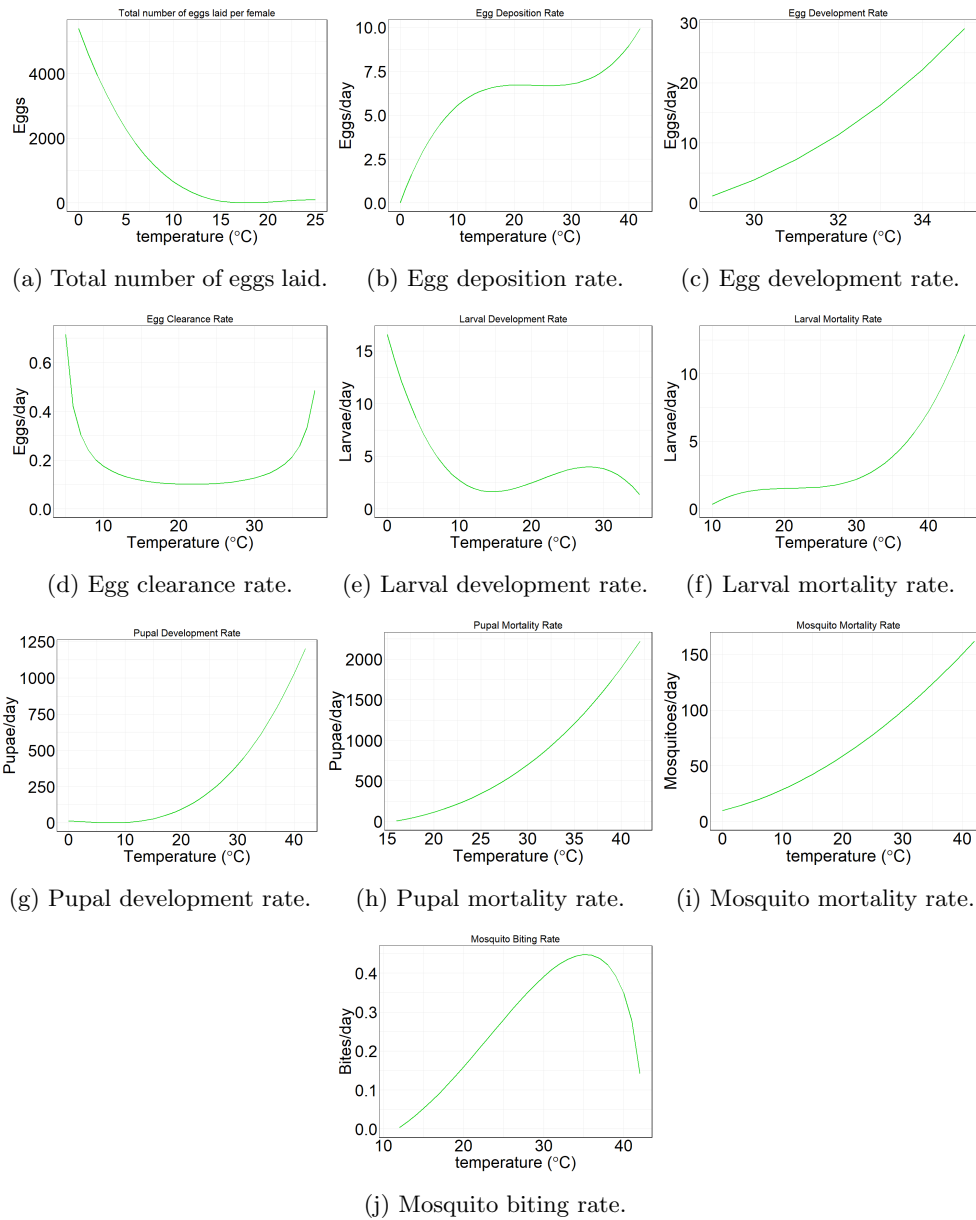

**Fig. A3:** Thermal response curves of temperature regulated mosquito life-cycle characteristics examined in Approach B.

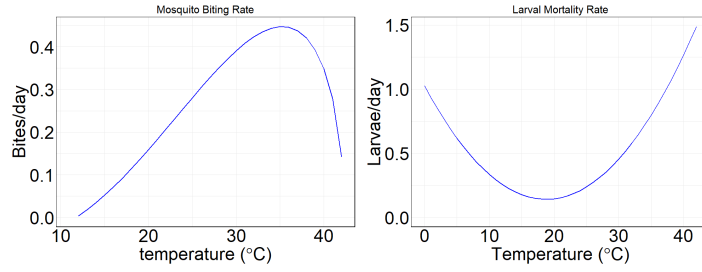

(a) Mosquito biting rate. (b) Larval mortality rate.

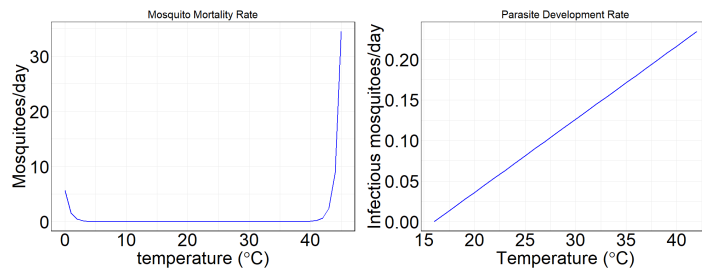

(c) Mosquito mortality rate. (d) Parasite development rate.

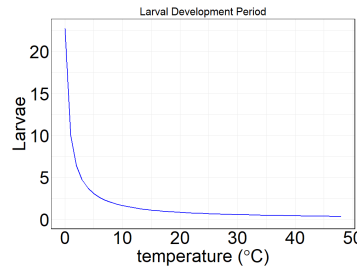

(e) Larval development period.

**Fig. A4:** Thermal response curves of temperature regulated mosquito life-cycle characteristics examined in Approach C.
